# Supplementary material
Source: Research Square preprint supplement (doi:10.21203/rs.3.rs-9606683/v1)
Supplement: Supplementary file 1 [file 4c5933f2baa7093fe305815f.pdf]

Supplementary Information for:  
Large-Scale Air-Quality Sensor Placement via  
Joint Optimization under Regional Constraints

Vinayak Rana<sup>1\*</sup>, Neerja Kasture<sup>1</sup>, Anura Mantri<sup>1</sup>, Nipun Batra<sup>1\*</sup>

<sup>1\*</sup>Department of Computer Science and Engineering, Indian Institute of  
Technology Gandhinagar, Gandhinagar, Gujarat, India.

\*Corresponding author(s). E-mail(s): [vinayak.rana@iitgn.ac.in](mailto:vinayak.rana@iitgn.ac.in);  
[nipun.batra@iitgn.ac.in](mailto:nipun.batra@iitgn.ac.in);

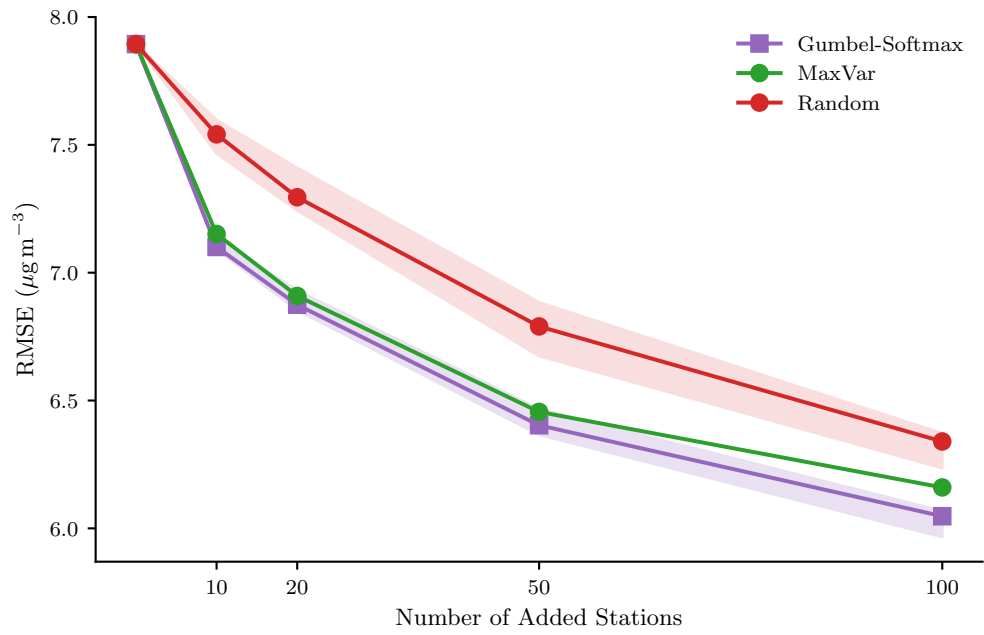

**Supplementary Figure S1** The plot shows the RMSE ( $\downarrow$ ) on the validation set as a function of the number of new stations added to the existing CPCB network across India. The shaded region represents the interquartile range (25th to 75th percentile) in RMSE over 5 independent runs. Our proposed Gumbel-Softmax method consistently outperforms the MaxVar and Random baselines.

| State                                    | Budget | Random             | MaxVar             | GSM Indep           | GSM Joint           | Winner    |
|------------------------------------------|--------|--------------------|--------------------|---------------------|---------------------|-----------|
| Andhra Pradesh                           | 3      | 5.46 ± 0.22        | 5.06 ± 0.00        | 5.07 ± 0.09         | <b>4.85 ± 0.10</b>  | GSM Joint |
| Arunachal Pradesh                        | 1      | 5.94 ± 0.17        | 6.00 ± 0.00        | 5.95 ± 0.02         | <b>5.86 ± 0.19</b>  | GSM Joint |
| Assam                                    | 3      | 7.69 ± 0.11        | 7.74 ± 0.00        | 7.92 ± 0.12         | <b>7.55 ± 0.11</b>  | GSM Joint |
| Bihar                                    | 7      | 9.35 ± 0.23        | 9.08 ± 0.00        | 9.09 ± 0.13         | <b>9.06 ± 0.07</b>  | GSM Joint |
| Chhattisgarh                             | 2      | 9.71 ± 0.46        | 8.88 ± 0.00        | 9.24 ± 0.31         | <b>8.15 ± 0.15</b>  | GSM Joint |
| Daman and Diu and Dadra and Nagar Haveli | 1      | 6.71 ± 0.50        | 7.28 ± 0.00        | 7.31 ± 0.03         | <b>6.32 ± 0.15</b>  | GSM Joint |
| Delhi                                    | 1      | 17.02 ± 0.04       | 16.76 ± 0.00       | 16.86 ± 0.08        | <b>16.66 ± 0.13</b> | GSM Joint |
| Goa                                      | 1      | 4.93 ± 0.74        | 4.72 ± 0.00        | 5.30 ± 0.02         | <b>4.34 ± 0.02</b>  | GSM Joint |
| Gujarat                                  | 5      | 10.04 ± 0.54       | 9.61 ± 0.00        | 9.92 ± 0.23         | <b>8.74 ± 0.22</b>  | GSM Joint |
| Haryana                                  | 2      | 7.20 ± 0.06        | 7.16 ± 0.00        | <b>7.02 ± 0.07</b>  | 7.35 ± 0.04         | GSM Indep |
| Himachal Pradesh                         | 1      | 5.53 ± 0.18        | <b>5.14 ± 0.00</b> | 5.53 ± 0.16         | 5.43 ± 0.04         | MaxVar    |
| Jammu and Kashmir                        | 2      | 7.66 ± 0.68        | <b>6.75 ± 0.00</b> | 8.90 ± 1.11         | 7.09 ± 0.60         | MaxVar    |
| Jharkhand                                | 3      | 11.10 ± 0.28       | 11.26 ± 0.00       | 10.60 ± 0.14        | <b>10.28 ± 0.43</b> | GSM Joint |
| Karnataka                                | 5      | <b>3.29 ± 0.04</b> | 3.33 ± 0.00        | 3.33 ± 0.04         | 3.33 ± 0.05         | Random    |
| Kerala                                   | 3      | 4.57 ± 0.19        | 4.55 ± 0.00        | 4.60 ± 0.05         | <b>4.30 ± 0.06</b>  | GSM Joint |
| Madhya Pradesh                           | 8      | 7.13 ± 0.27        | 7.30 ± 0.00        | 6.81 ± 0.18         | <b>6.56 ± 0.13</b>  | GSM Joint |
| Maharashtra                              | 7      | 5.88 ± 0.07        | <b>5.54 ± 0.00</b> | 5.67 ± 0.12         | 5.71 ± 0.07         | MaxVar    |
| Manipur                                  | 1      | 6.21 ± 0.37        | 6.36 ± 0.00        | <b>6.11 ± 0.06</b>  | 6.55 ± 0.04         | GSM Indep |
| Meghalaya                                | 1      | <b>9.28 ± 0.34</b> | 10.03 ± 0.00       | 10.22 ± 0.28        | 9.29 ± 0.93         | Random    |
| Mizoram                                  | 1      | 5.51 ± 0.86        | <b>4.48 ± 0.00</b> | 4.98 ± 0.02         | 4.83 ± 0.03         | MaxVar    |
| Nagaland                                 | 1      | 5.02 ± 0.24        | <b>4.29 ± 0.00</b> | 5.40 ± 0.12         | 5.07 ± 0.06         | MaxVar    |
| Odisha                                   | 4      | 8.90 ± 0.34        | 8.86 ± 0.00        | <b>8.56 ± 0.21</b>  | 8.93 ± 0.18         | GSM Indep |
| Puducherry                               | 1      | 3.80 ± 0.32        | 3.59 ± 0.00        | 3.50 ± 0.04         | <b>3.47 ± 0.04</b>  | GSM Joint |
| Punjab                                   | 3      | 8.23 ± 0.41        | 8.72 ± 0.00        | <b>8.09 ± 0.53</b>  | 8.42 ± 0.05         | GSM Indep |
| Rajasthan                                | 5      | 7.50 ± 0.16        | 7.24 ± 0.00        | <b>7.18 ± 0.19</b>  | 7.18 ± 0.11         | GSM Indep |
| Sikkim                                   | 1      | 6.61 ± 0.38        | 6.61 ± 0.00        | <b>6.07 ± 0.00</b>  | 6.48 ± 0.05         | GSM Indep |
| Tamilnadu                                | 6      | <b>3.84 ± 0.01</b> | 3.93 ± 0.00        | 3.85 ± 0.03         | 3.89 ± 0.05         | Random    |
| Telengana                                | 2      | 5.90 ± 0.32        | 6.09 ± 0.00        | <b>5.69 ± 0.05</b>  | 5.82 ± 0.20         | GSM Indep |
| Tripura                                  | 1      | 8.58 ± 0.72        | 8.73 ± 0.00        | <b>8.39 ± 0.06</b>  | 8.52 ± 0.12         | GSM Indep |
| Uttar Pradesh                            | 15     | 9.05 ± 0.37        | 8.43 ± 0.00        | <b>8.19 ± 0.17</b>  | 8.47 ± 0.12         | GSM Indep |
| Uttarakhand                              | 1      | 7.80 ± 0.22        | 7.65 ± 0.00        | <b>7.51 ± 0.08</b>  | 7.58 ± 0.18         | GSM Indep |
| West Bengal                              | 5      | 12.75 ± 0.30       | 12.26 ± 0.00       | <b>12.12 ± 0.26</b> | 12.80 ± 0.27        | GSM Indep |

**Table S1** State-Level comparison of RMSE after a pilot expansion of  $N = 103$  monitoring stations under fixed state-level budgets (as listed). Our Joint GSM framework achieves the lowest RMSE in 13 out of 32 administrative regions, outperforming the independently constrained GSM variant (11 regions), the greedy Max-Variance baseline (5 regions), and random placement (3 regions). These results indicate that coordinated national-scale optimization provides broader and more reliable accuracy improvements than region-wise or purely heuristic deployment strategies. Results report the mean  $\pm$  standard deviation over 5 independent optimization seeds.
